# Supplementary material for: Controlled-release testing of the static chamber methodology for direct measurements of methane emissions
Source: Copernicus journal article supplement (doi:10.5194/amt-16-3421-2023), 2023-07-06
Supplement: Supplementary file 1 [file amt-16-3421-2023-supplement.zip]

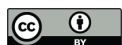

## *Supplement of*

# **Controlled-release testing of the static chamber methodology for direct measurements of methane emissions**

**James P. Williams et al.**

*Correspondence to:* James P. Williams ([philip.williams@mail.mcgill.ca](mailto:philip.williams@mail.mcgill.ca))

- [amt-16-3421-2023-supplement-title-page.pdf](#)
- [20230511\\_Supplementary\\_Material](#)
  - [20230209\\_IPCC\\_EmissionFactors\\_AFOLU\\_AMT.xlsx](#)
  - [20230209\\_IPCC\\_EmissionFactors\\_Energy\\_AMT.xlsx](#)
  - [20230209\\_IPCC\\_EmissionFactors\\_Waste\\_AMT.xlsx](#)
  - [20230628\\_AMT\\_SI.docx](#)
  - [20230628\\_AMT\\_SI\\_mod.pdf](#)
  - [READ\\_FIRST\\_ExcelFiles.txt](#)

The copyright of individual parts of the supplement might differ from the article licence.
